# Supplementary material
Source: Springer Nature journal article supplement (https://www.springermedizin.de/resource/supplementary/12874_2011_641_MOESM6_ESM.pdf/9432304)

**Polytomous Regression**

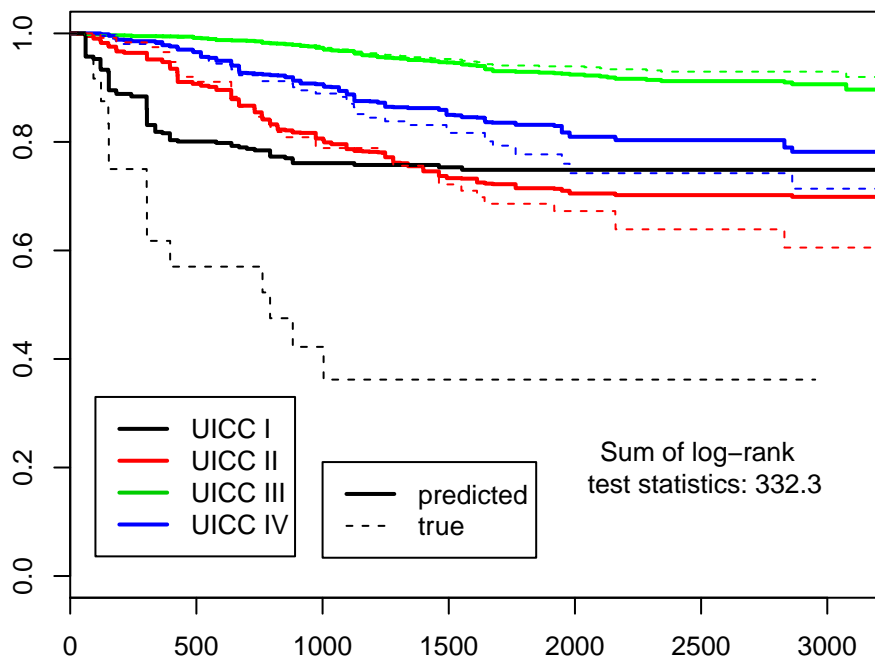

**Predictive Mean Matching**

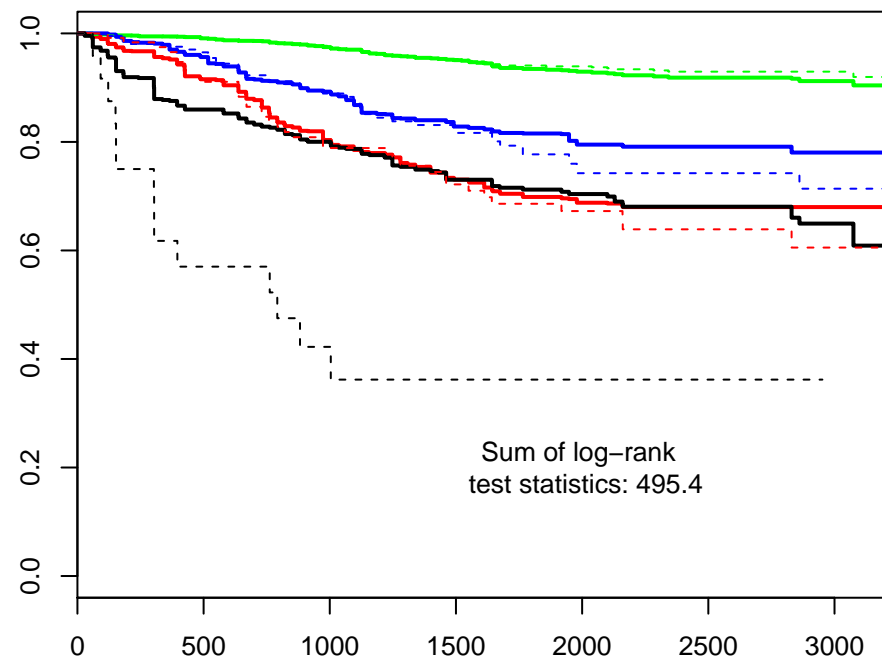

**Random Forest**

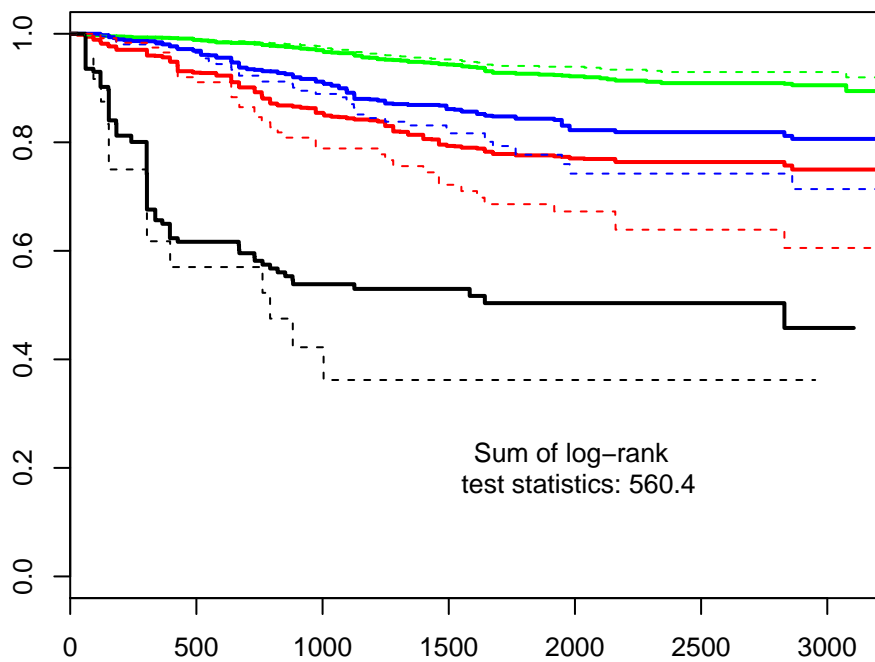

**Proportional Sampling**

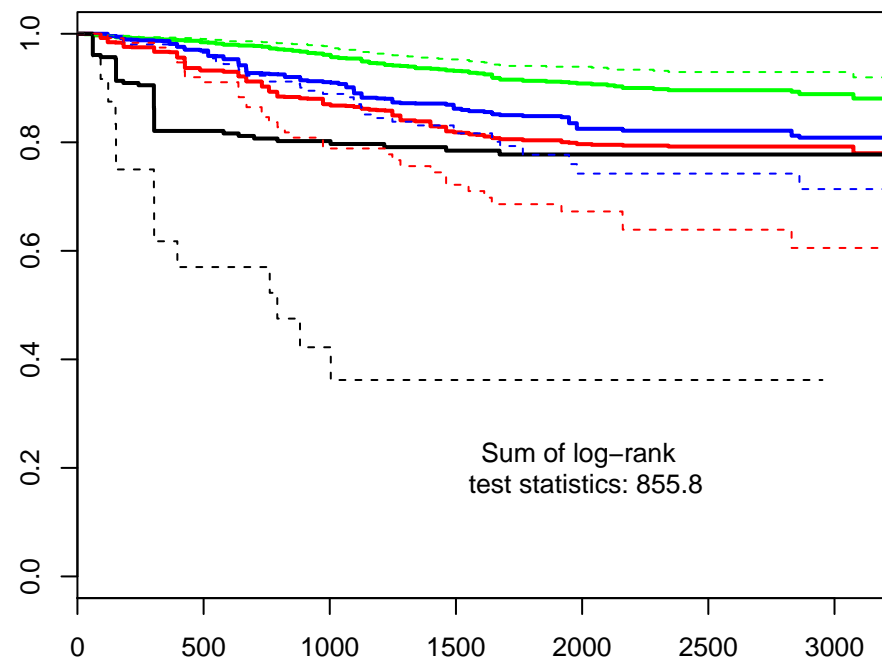

Supplement: MOESM6 [file 9432304]
